# Supplementary material for: High-throughput single-cell whole-genome amplification through centrifugal emulsification and eMDA
Source: PubMed Central journal article supplement (PMC6488574; doi:10.1038/s42003-019-0401-y), 2019-04-29
Supplement: 42003_2019_401_MOESM1_ESM.pdf [file 42003_2019_401_MOESM1_ESM.pdf]

## Description of Additional Supplementary Files

**File Name:** Supplementary Data 1

**Description:** The raw data for the representative CNV pattern and the raw data for MAD and mapping rate for each sample in Figure 3.

**File Name:** Supplementary Data 2

**Description:** The raw data for the heatmap in Figure 3

**File Name:** Supplementary Data 3

**Description:** The raw data for Figure 4a, 4b, 4d, 4e.

**File Name:** Supplementary Data 4

**Description:** The raw data for Figure 4c.

**File Name:** Supplementary Data 5

**Description:** The raw data for Figure 5a, 5b, 5d.

**File Name:** Supplementary Data 6

**Description:** The raw data for Figure 5c
