# Supplementary material for: High-throughput single-cell whole-genome amplification through centrifugal emulsification and eMDA
Source: PubMed Central journal article supplement (PMC6488574; doi:10.1038/s42003-019-0401-y), 2019-04-29
Supplement: 42003_2019_401_MOESM2_ESM.pdf [file 42003_2019_401_MOESM2_ESM.pdf]

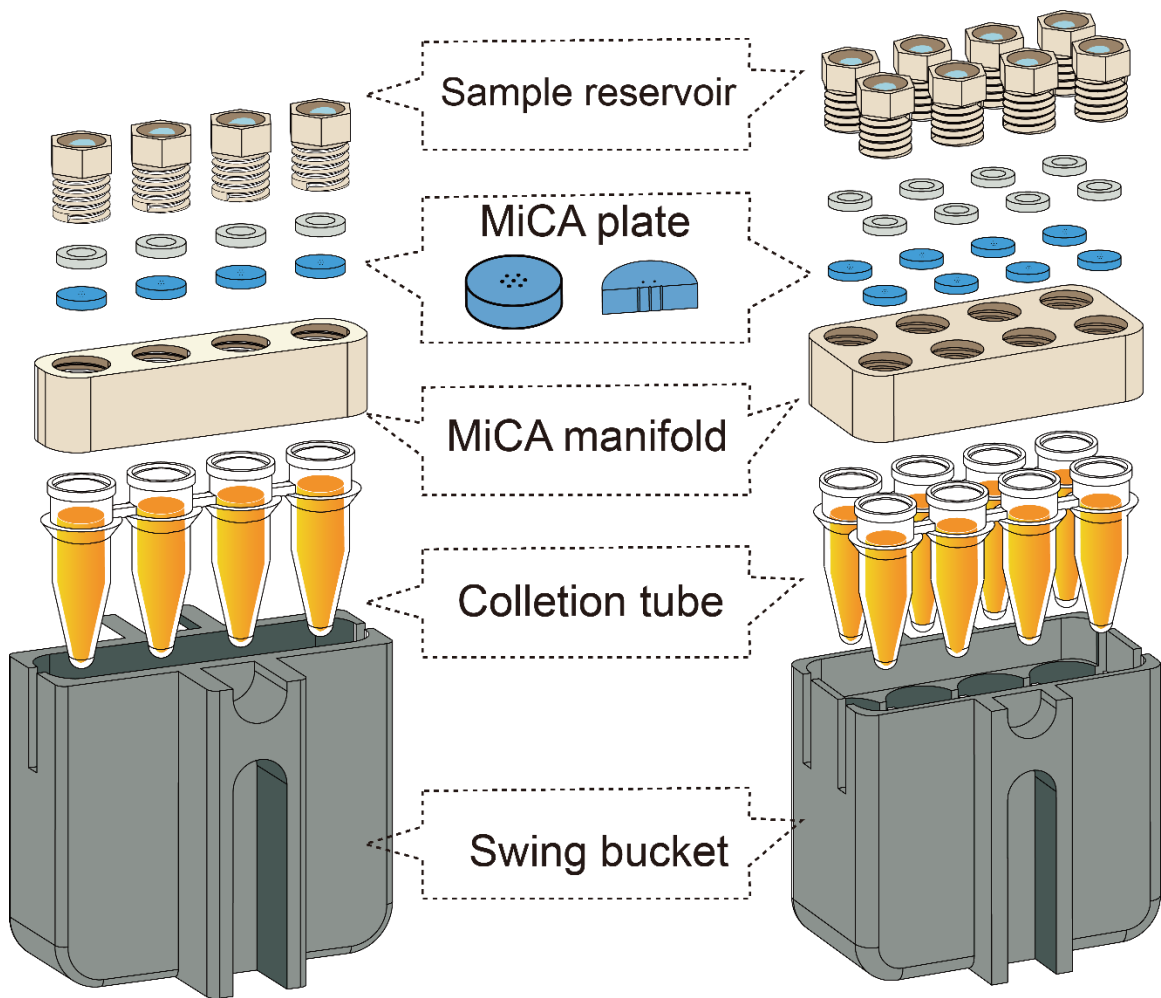

**Figure S1.** Schematic illustration of high-throughput centrifugation MiCA assembly (left: 24 samples per run. Right: 48 samples per run).

a)

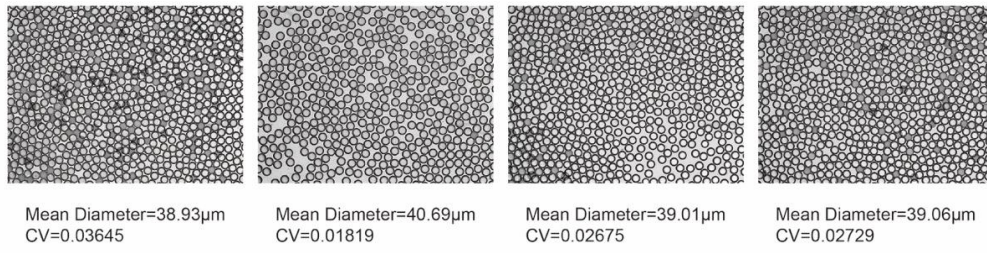

b)

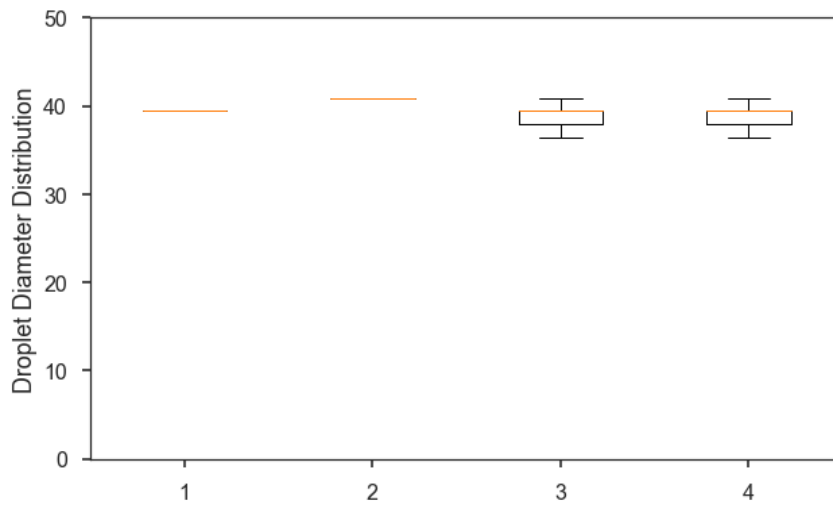

**Figure S2.** a) Microscopic images and b) size distribution of the water-in-oil emulsion droplets generated by four MiCA in the same single swing bucket.

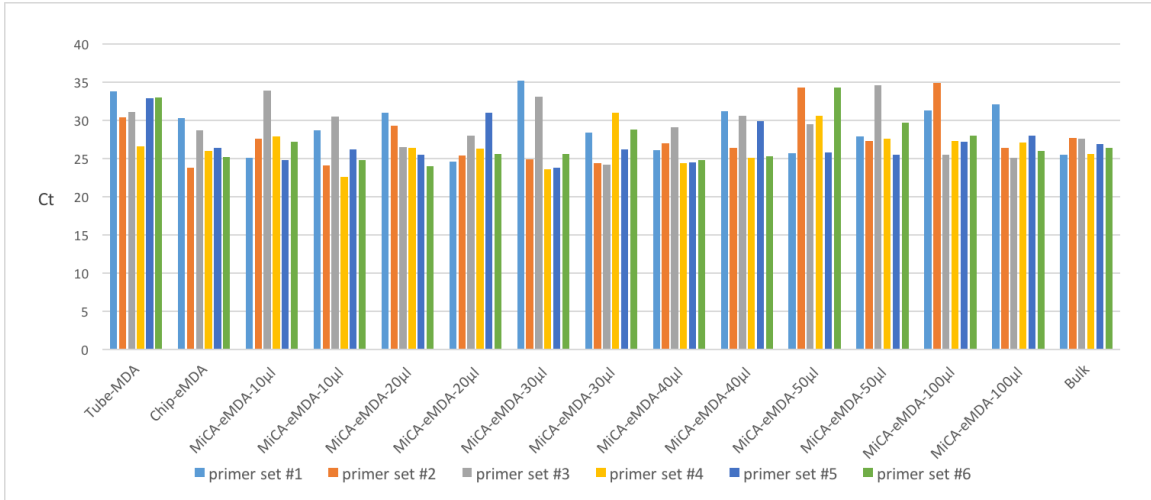

**Figure S3.** Quantitative PCR QC results of the WGA products.

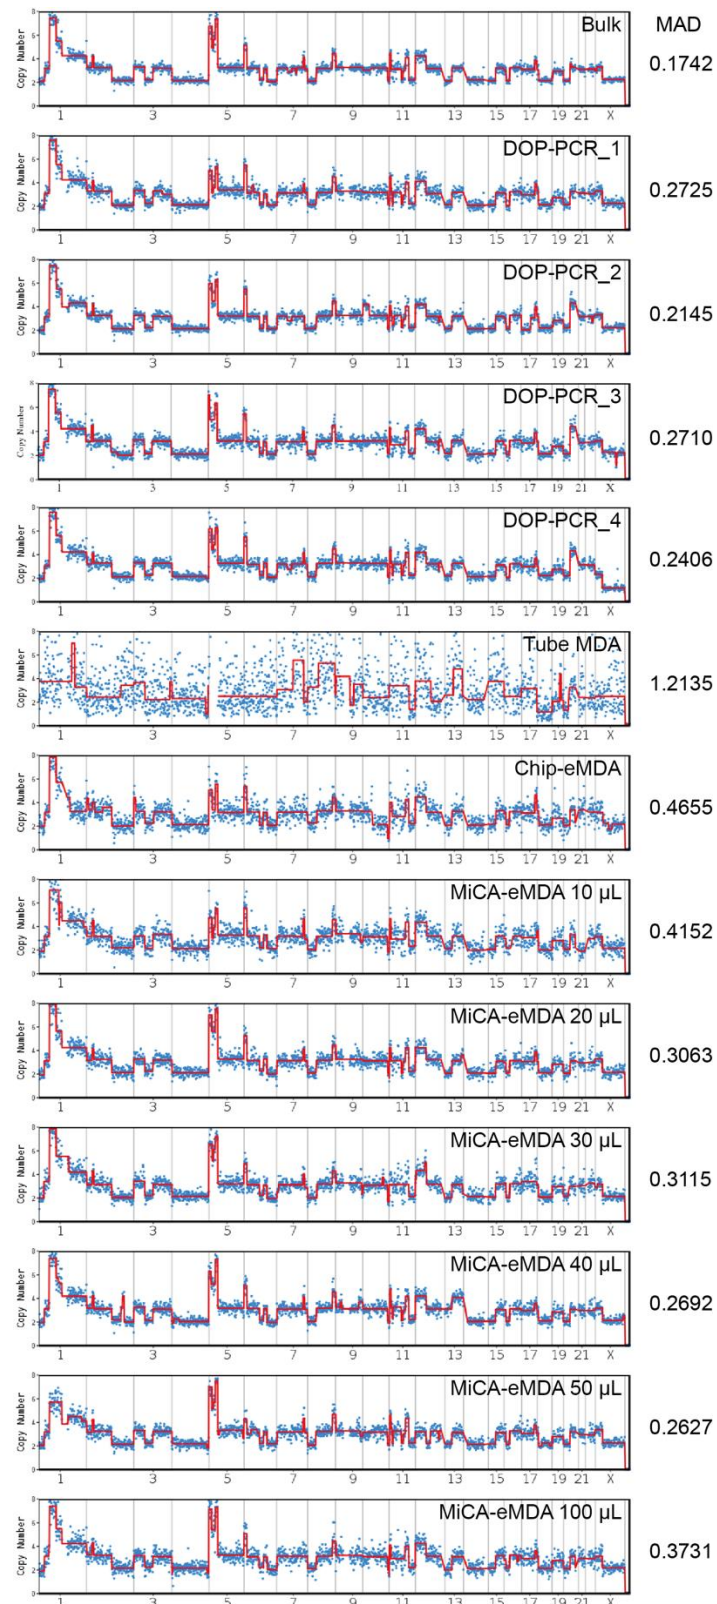

**Figure S4.** The whole-genome copy number profiles of different samples. (More on our website <http://wgs.beiseq.cn>)

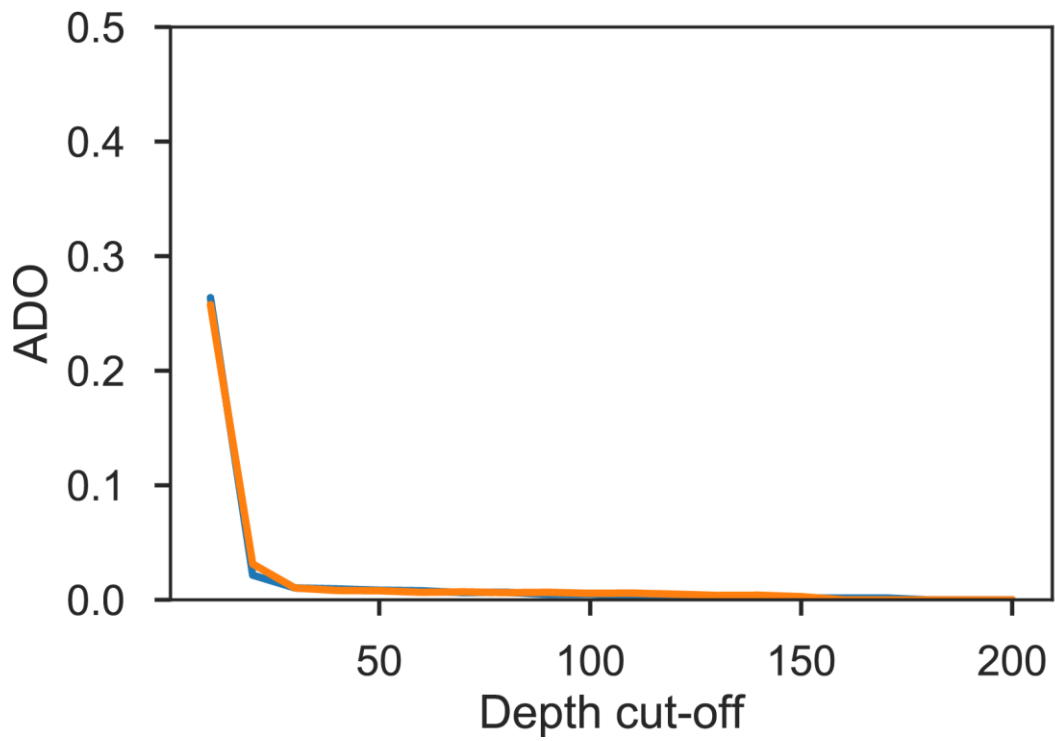

**Figure S5.** The allele drop-out (ADO) of two unamplified bulk samples after panel enrichment compared to whole genome sequencing data.

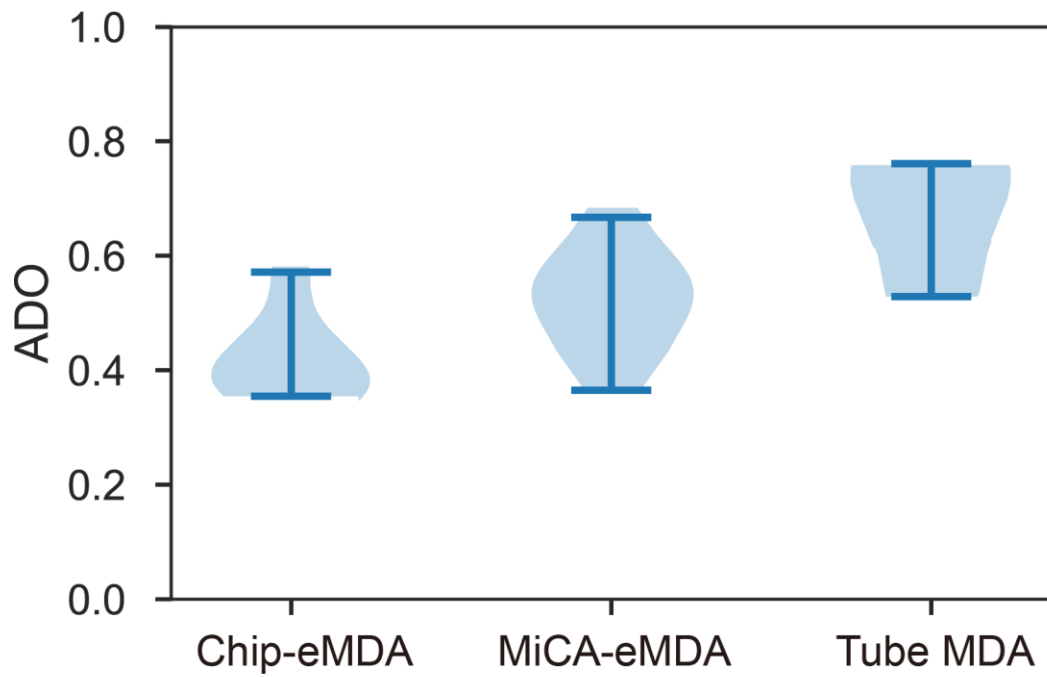

**Figure S6.** The allele drop-out (ADO) of scWGA products from different methods by deep sequencing after panel enrichment.

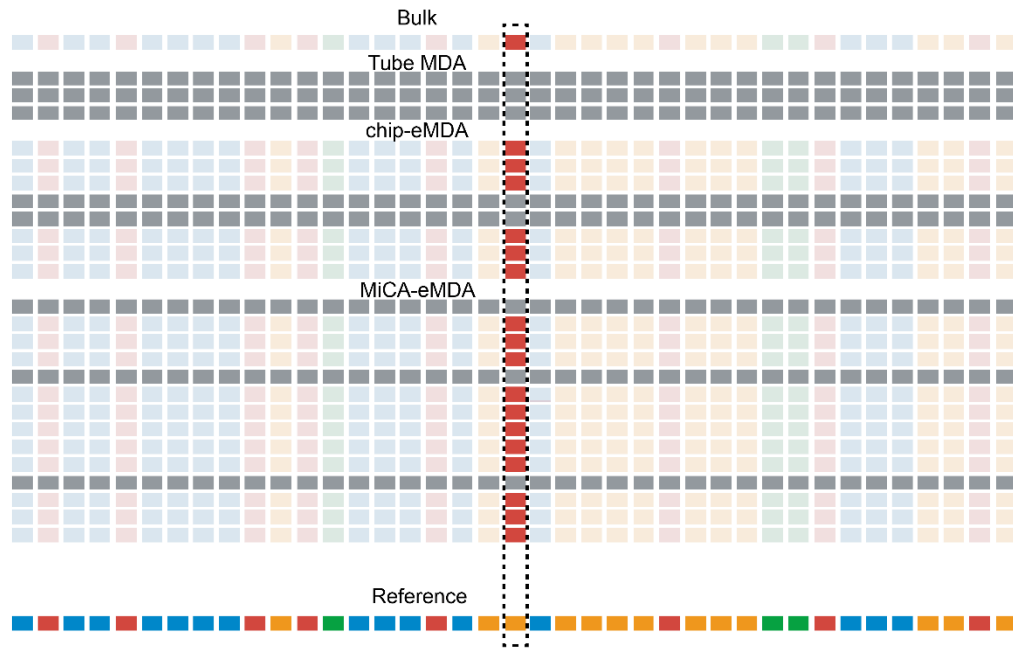

**Figure S7.** Base composition of individual samples in a region with a valid homozygous SNV. Grey blocks represent loci with no sequencing coverage.

**Table S1.** The qPCR primers used for quality control

| primer set | chromosome | Sequence (5'-3')                                                    |
|------------|------------|---------------------------------------------------------------------|
| #1         | 1          | forward: TTTGATGGAGAAATCCGAGG<br>reverse: CTGACTCGGAGAGCAGGAC       |
| #2         | 3          | forward: AGGCTGCTTGACACTTTGAGGA<br>reverse: TAGCATTGAAGGTGTGCCTTGC  |
| #3         | 5          | forward: CTTGCACCAGAATTGCACTGAA<br>reverse: GATGTCAATTCTCCCCAGACTGA |
| #4         | 10         | forward: CTTCTGACCTGTTTGCAGT<br>reverse: CTTCAGTGCACAGAATGCAG       |
| #5         | 12         | forward: CGCTCCTGCCCTTACCTCTATC<br>reverse: AAACCCGGGAGAAGGAGTATCA  |
| #6         | 22         | forward: CTGCCAGCCCAATGTTTGTACT<br>reverse: GGAAGGAAATGAGGCTTCAACC  |



**Table S2.** Sequencing data summary of all the samples

| <b>sample Name</b> | <b>whole genome sequencing data(G)</b> | <b>panel enriched sequencing data(G)</b> |
|--------------------|----------------------------------------|------------------------------------------|
| bulk_1             | 146.3                                  | 3.8                                      |
| bulk_2             | 1.4                                    | 5.6                                      |
| chip-eMDA_1        | 1.9                                    | 3.5                                      |
| chip-eMDA_2        | 2.3                                    | 2.4                                      |
| chip-eMDA_3        | 2.1                                    | 3.3                                      |
| chip-eMDA_4        | 1.8                                    | 2.8                                      |
| chip-eMDA_5        | 2.2                                    | 2.5                                      |
| chip-eMDA_6        | 2.2                                    | 3.5                                      |
| chip-eMDA_7        | 2.7                                    | 3.8                                      |
| chip-eMDA_8        | 2.4                                    | 3.6                                      |
| mica-eMDA_100ul_1  | 1.2                                    | -                                        |
| mica-eMDA_100ul_2  | 1                                      | -                                        |
| mica-eMDA_100ul_3  | 1.2                                    | -                                        |
| mica-eMDA_100ul_4  | 1.1                                    | -                                        |
| mica-eMDA_100ul_5  | 1.1                                    | -                                        |
| mica-eMDA_10ul_1   | 1.2                                    | -                                        |
| mica-eMDA_10ul_2   | 0.9                                    | -                                        |
| mica-eMDA_10ul_3   | 0.8                                    | -                                        |
| mica-eMDA_10ul_4   | 0.8                                    | -                                        |
| mica-eMDA_10ul_5   | 0.8                                    | -                                        |
| mica-eMDA_10ul_6   | 0.9                                    | -                                        |
| mica-eMDA_10ul_7   | 1.4                                    | -                                        |
| mica-eMDA_20ul_1   | 1                                      | -                                        |
| mica-eMDA_20ul_2   | 1.3                                    | -                                        |
| mica-eMDA_20ul_3   | 1.4                                    | 3.7                                      |
| mica-eMDA_20ul_4   | 1.2                                    | 2.8                                      |
| mica-eMDA_20ul_5   | 0.9                                    | -                                        |
| mica-eMDA_20ul_6   | 1.1                                    | -                                        |
| mica-eMDA_30ul_1   | 1.1                                    | -                                        |
| mica-eMDA_30ul_10  | 0.8                                    | 4.1                                      |
| mica-eMDA_30ul_11  | 1                                      | -                                        |
| mica-eMDA_30ul_12  | 1                                      | -                                        |
| mica-eMDA_30ul_13  | 1                                      | -                                        |
| mica-eMDA_30ul_2   | 1.2                                    | -                                        |
| mica-eMDA_30ul_3   | 1.1                                    | 3.3                                      |

|                  |       |     |
|------------------|-------|-----|
| mica-eMDA_30ul_4 | 1.1   | 3.5 |
| mica-eMDA_30ul_5 | 1     | 3.3 |
| mica-eMDA_30ul_6 | 1.1   | 3.3 |
| mica-eMDA_30ul_7 | 1.1   | -   |
| mica-eMDA_30ul_8 | 1.1   | -   |
| mica-eMDA_30ul_9 | 0.9   | 3.6 |
| mica-eMDA_40ul_1 | 0.9   | 3.3 |
| mica-eMDA_40ul_2 | 1     | 2.9 |
| mica-eMDA_40ul_3 | 1     | -   |
| mica-eMDA_40ul_4 | 1     | -   |
| mica-eMDA_40ul_5 | 144.8 | 2.9 |
| mica-eMDA_40ul_6 | 0.9   | 3.7 |
| mica-eMDA_40ul_7 | 0.9   | -   |
| mica-eMDA_40ul_8 | 0.8   | -   |
| mica-eMDA_40ul_9 | 1.2   | -   |
| mica-eMDA_50ul_1 | 0.9   | -   |
| mica-eMDA_50ul_2 | 0.9   | -   |
| mica-eMDA_50ul_3 | 1.1   | -   |
| mica-eMDA_50ul_4 | 1.3   | -   |
| mica-eMDA_50ul_5 | 1     | -   |
| mica-eMDA_50ul_6 | 1.2   | -   |
| tube_MDA_1       | 0.9   | 2.5 |
| tube_MDA_2       | 1     | 1.8 |
| tube_MDA_3       | 0.8   | 1.8 |
| tube_MDA_4       | 2.4   | -   |
| tube_MDA_5       | 2.9   | -   |
| tube_MDA_6       | 2.2   | -   |
| tube_MDA_7       | 2.2   | -   |
| tube_MDA_8       | 2.3   | -   |
| tube_MDA_9       | 2.5   | -   |

---

**Table S3.** The copy number profiling of HeLa unamplified sample

| chromosome | start (absolute position) | end (absolute position) | copy number |
|------------|---------------------------|-------------------------|-------------|
| 1          | 10,385                    | 29,761,479              | 2           |
| 1          | 31,086,446                | 55,003,046              | 3           |
| 1          | 56,178,924                | 89,765,081              | 7           |
| 1          | 90,975,802                | 119,033,213             | 5           |
| 1          | 120,326,412               | 247,506,457             | 4           |
| 2          | 249,260,607               | 276,243,614             | 3           |
| 2          | 277,390,497               | 284,356,528             | 4           |
| 2          | 285,520,516               | 378,027,784             | 3           |
| 2          | 379,239,725               | 491,696,612             | 2           |
| 3          | 492,510,170               | 548,533,431             | 3           |
| 3          | 549,685,886               | 590,133,240             | 2           |
| 3          | 591,377,717               | 689,477,857             | 3           |
| 4          | 690,576,122               | 880,865,128             | 2           |
| 5          | 881,638,447               | 896,892,073             | 7           |
| 5          | 898,065,953               | 904,633,187             | 5           |
| 5          | 905,796,654               | 914,002,640             | 6           |
| 5          | 915,189,432               | 926,482,876             | 7           |
| 5          | 927,743,130               | 1,061,688,507           | 3           |
| 6          | 1,062,690,045             | 1,077,404,032           | 5           |
| 6          | 1,078,542,876             | 1,143,262,493           | 3           |
| 6          | 1,144,562,036             | 1,164,282,568           | 2           |
| 6          | 1,165,448,776             | 1,182,179,288           | 3           |
| 6          | 1,183,382,047             | 1,233,001,066           | 2           |
| 7          | 1,233,667,184             | 1,368,551,837           | 3           |
| 7          | 1,369,691,532             | 1,375,701,777           | 4           |
| 7          | 1,377,460,604             | 1,391,647,275           | 3           |
| 8          | 1,392,877,344             | 1,435,629,088           | 2           |
| 8          | 1,440,062,409             | 1,520,087,249           | 3           |
| 8          | 1,521,236,921             | 1,537,701,111           | 4           |
| 9          | 1,539,169,699             | 1,678,914,393           | 3           |
| 10         | 1,680,441,317             | 1,806,331,248           | 3           |
| 10         | 1,807,465,858             | 1,814,774,439           | 2           |
| 11         | 1,815,978,694             | 1,817,610,375           | 2           |
| 11         | 1,818,890,827             | 1,822,955,180           | 4           |
| 11         | 1,824,184,686             | 1,876,797,619           | 3           |
| 11         | 1,878,079,295             | 1,885,723,650           | 2           |
| 11         | 1,886,899,675             | 1,897,986,776           | 3           |
| 11         | 1,899,179,073             | 1,917,197,030           | 4           |

|    |               |               |   |
|----|---------------|---------------|---|
| 11 | 1,918,390,795 | 1,950,127,628 | 2 |
| 12 | 1,950,976,038 | 2,005,478,234 | 4 |
| 12 | 2,006,731,421 | 2,083,904,678 | 3 |
| 13 | 2,103,786,916 | 2,139,818,824 | 2 |
| 13 | 2,141,005,047 | 2,199,601,358 | 3 |
| 14 | 2,220,276,991 | 2,305,582,831 | 2 |
| 15 | 2,329,770,718 | 2,366,937,280 | 2 |
| 15 | 2,368,100,410 | 2,409,491,301 | 3 |
| 16 | 2,409,877,097 | 2,420,561,029 | 3 |
| 16 | 2,421,688,401 | 2,438,373,162 | 2 |
| 16 | 2,440,560,293 | 2,499,064,230 | 3 |
| 17 | 2,500,171,865 | 2,568,482,914 | 3 |
| 17 | 2,569,640,094 | 2,580,224,246 | 4 |
| 18 | 2,581,551,675 | 2,589,837,904 | 3 |
| 18 | 2,591,014,240 | 2,658,546,123 | 2 |
| 19 | 2,659,535,160 | 2,718,382,797 | 3 |
| 20 | 2,718,633,291 | 2,751,989,131 | 2 |
| 20 | 2,753,180,543 | 2,758,981,786 | 4 |
| 20 | 2,760,142,735 | 2,781,078,711 | 3 |
| 21 | 2,797,024,243 | 2,829,327,763 | 3 |
| 22 | 2,847,002,828 | 2,880,747,920 | 3 |
| X  | 2,883,732,744 | 2,918,531,717 | 3 |
| X  | 2,919,707,611 | 3,035,072,959 | 2 |

---
